# Supplementary material
Source: MDPI journal article supplement (https://www.mdpi.com/2075-4701/12/1/59)
Supplement: s1 [file s1]

# Electrodeposition of Indium from an Ionic Liquid Investigated by In Situ Electrochemical XPS

Zhen Liu \*, Jun Cheng, Oliver Höfft and Frank Endres \*

Institute of Electrochemistry, Clausthal University of Technology, Arnold-Sommerfeld-Strasse 6, 38678 Clausthal-Zellerfeld, Germany; jun.cheng@tu-clausthal.de (J.C.); oliver.hoefft@tu-clausthal.de (O.H.)

\* Correspondence: zhen.liu@tu-clausthal.de (Z.L.); frank.endres@tu-clausthal.de (F.E.)

**Citation:** Liu, Z.; Cheng, J.; Höfft, O.; Endres, F. Electrodeposition of Indium from an Ionic Liquid Investigated by In Situ Electrochemical XPS. *Metals* **2022**, *12*, 59. <https://doi.org/10.3390/met12010059>

Academic Editor: Bernd Friedrich

Received: 6 December 2021

Accepted: 22 December 2021

Published: 27 December 2021

**Publisher's Note:** MDPI stays neutral with regard to jurisdictional claims in published maps and institutional affiliations.

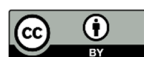

**Copyright:** © 2021 by the authors. Licensee MDPI, Basel, Switzerland. This article is an open access article distributed under the terms and conditions of the Creative Commons Attribution (CC BY) license (<https://creativecommons.org/licenses/by/4.0/>).

## Supporting Information

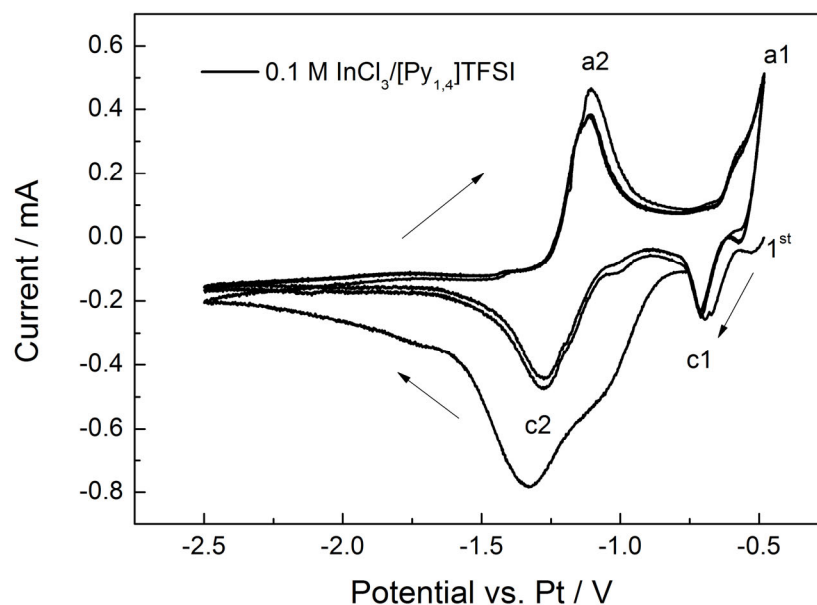

**Figure S1.** CV of 0.1 mol/L  $\text{InCl}_3$  in  $[\text{Py}_{1,4}]\text{TFSI}$  in UHV on an Au electrode between  $-0.5$  V and  $-2.5$  V vs. quasi-Pt reference. Scan rate of  $10 \text{ mV s}^{-1}$ .
